# Supplementary material for: Loosening ER–Mitochondria Coupling by the Expression of the Presenilin 2 Loop Domain
Source: MDPI journal article supplement (doi:10.3390/cells10081968), 2021-08-03
Supplement: s1 [file s1]

Supplementary Figure S1

HeLa cells

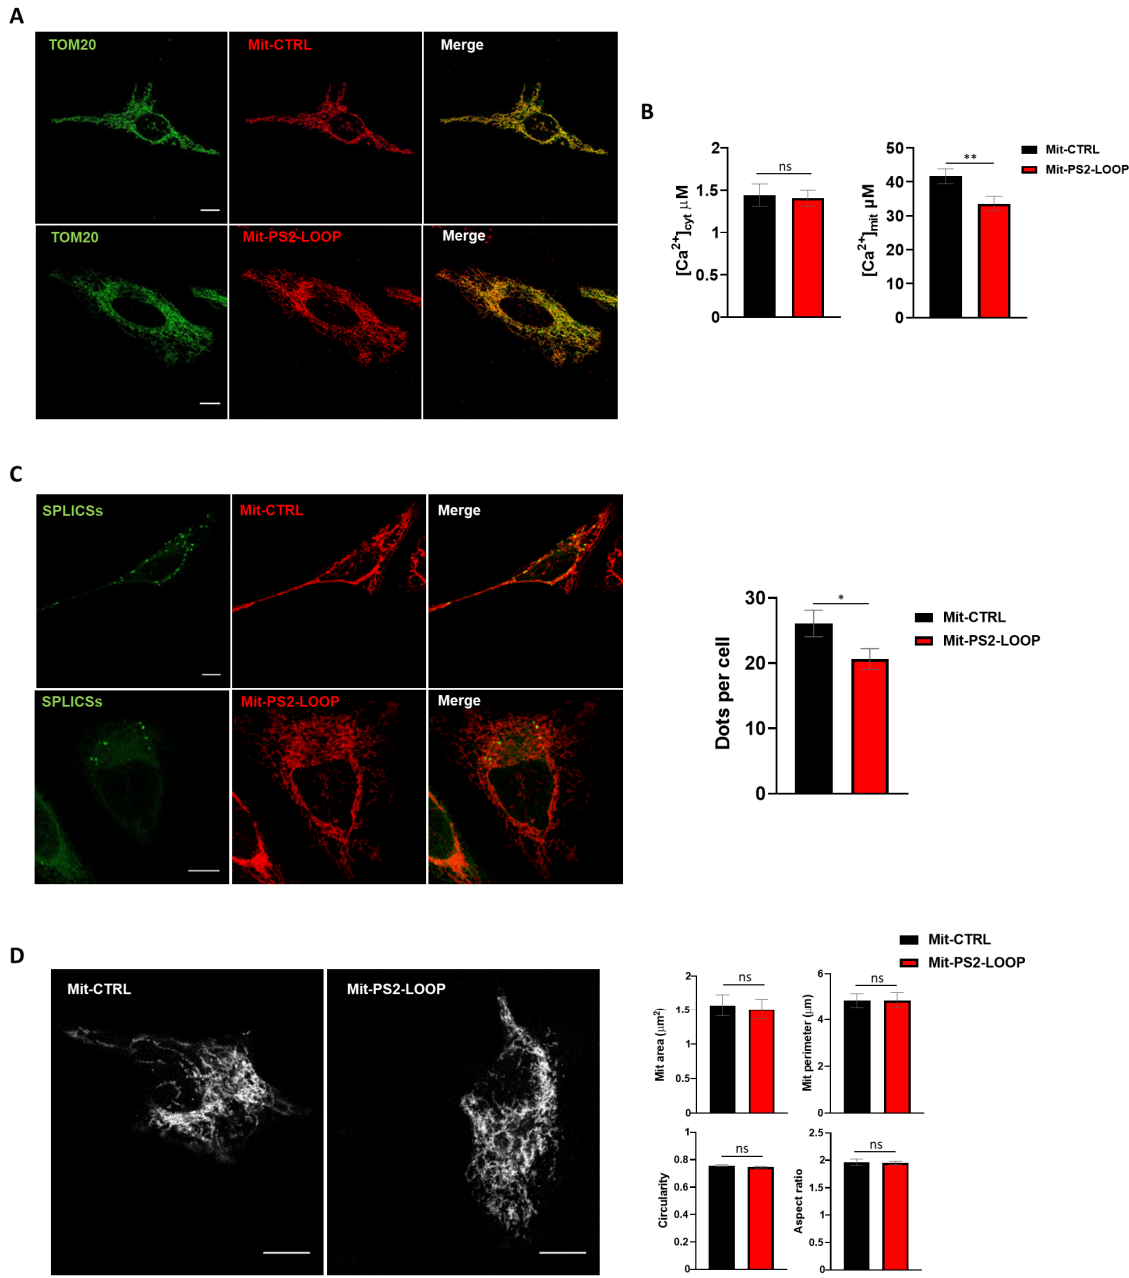

## Supplementary Table S1

| FIGURE 1   |                                               |    |        | Test       | p value                                       |    |         |                   |                                               | Test  | p value |  |  |  |  | Test | p value |
|------------|-----------------------------------------------|----|--------|------------|-----------------------------------------------|----|---------|-------------------|-----------------------------------------------|-------|---------|--|--|--|--|------|---------|
| Figure 1B  | CTRL vs CTRL pre-depleted                     | MW | 0.0003 | Figure 1C  | CTRL vs CTRL pre-depleted                     | MW | 0.0005  |                   |                                               |       |         |  |  |  |  |      |         |
|            | CTRL vs PS2-CTF                               | MW | 0.0008 |            | CTRL vs PS2-CTF                               | MW | 0.001   |                   |                                               |       |         |  |  |  |  |      |         |
|            | CTRL vs PS2-WT                                | MW | 0.0025 |            | CTRL vs PS2-WT                                | MW | 0.001   |                   |                                               |       |         |  |  |  |  |      |         |
|            | CTRL dep vs PS2-CTF                           | MW | 0.0038 |            | CTRL dep vs PS2-CTF                           | MW | 0.0029  |                   |                                               |       |         |  |  |  |  |      |         |
|            | CTRL dep vs PS2-WT                            | MW | 0.0003 |            | CTRL dep vs PS2-WT                            | MW | <0.0001 |                   |                                               |       |         |  |  |  |  |      |         |
|            | PS2-CTF vs PS2-WT                             | MW | 0.0864 |            | PS2-CTF vs PS2-WT                             | MW | 0.2123  |                   |                                               |       |         |  |  |  |  |      |         |
| FIGURE 2   |                                               |    |        |            |                                               |    |         |                   |                                               |       |         |  |  |  |  |      |         |
| Figure 2E  | BK + CPA                                      | MW | 0.5996 | Figure 2F  | BK + CPA                                      | TT | 0.6826  |                   |                                               |       |         |  |  |  |  |      |         |
|            | FCS + CPA                                     | TT | 0.8327 |            | FCS + CPA                                     | MW | >0.9999 |                   |                                               |       |         |  |  |  |  |      |         |
| FIGURE 3   |                                               |    |        |            |                                               |    |         |                   |                                               |       |         |  |  |  |  |      |         |
| Figure 3D  | BK+CPA                                        | TT | 0.5649 | Figure 3E  | BK+CPA                                        | TT | 0.0026  | Figure 3F         | CCE cyt                                       | MW    | 0.9276  |  |  |  |  |      |         |
|            | FCS+CPA                                       | TT | 0.9791 |            | FCS+CPA                                       | TT | 0.0175  |                   | CCE mit                                       | MW    | 0.8801  |  |  |  |  |      |         |
| FIGURE 4   |                                               |    |        |            |                                               |    |         |                   |                                               |       |         |  |  |  |  |      |         |
| Figure 4B  | CTRL: Mit-CTRL vs Mit-PS2- LOOP               | MW | 0.9406 | Figure 4C  | CTRL: Mit-CTRL vs Mit-PS2- LOOP               | MW | 0.4212  | Figure 4D         | CTRL: Mit-CTRL vs Mit-PS2- LOOP               | MW    | 0.5499  |  |  |  |  |      |         |
|            | FAD-PS2: Mit-CTRL vs Mit-PS2- LOOP            | MW | 0.0339 |            | FAD-PS2: Mit-CTRL vs Mit-PS2- LOOP            | MW | 0.9755  |                   | FAD-PS2: Mit-CTRL vs Mit-PS2- LOOP            | MW    | 0.0283  |  |  |  |  |      |         |
|            | CTRL Mit-CTRL vs FAD-PS2 Mit-CTRL             | MW | 0.0456 |            | CTRL: Mit-CTRL vs FAD-PS2: Mit-CTRL           | MW | 0.0332  |                   | CTRL: Mit-CTRL vs FAD-PS2: Mit-CTRL           | MW    | <0.0001 |  |  |  |  |      |         |
|            | CTRL Mit-PS2- LOOP vs FAD-PS2 Mit-PS2- LOOP   | MW | 0.0319 |            | CTRL Mit-PS2- LOOP vs FAD-PS2: Mit-PS2- LOOP  | MW | 0.0206  |                   | CTRL: Mit-PS2- LOOP vs FAD-PS2: Mit-PS2- LOOP | MW    | <0.0001 |  |  |  |  |      |         |
| Figure 4F  | CTRL: Mit-CTRL vs Mit-PS2- LOOP               | MW | 0.2704 | Figure 4G  | CTRL: Mit-CTRL vs Mit-PS2- LOOP               | MW | 0.1391  |                   |                                               |       |         |  |  |  |  |      |         |
|            | FAD-PS2: Mit-CTRL vs Mit-PS2- LOOP            | MW | 0.2293 |            | FAD-PS2: Mit-CTRL vs Mit-PS2- LOOP            | MW | <0.0001 |                   |                                               |       |         |  |  |  |  |      |         |
|            | CTRL: Mit-CTRL vs FAD-PS2: Mit-CTRL           | MW | 0.0214 |            | CTRL: Mit-CTRL vs FAD-PS2: Mit-CTRL           | MW | <0.0001 |                   |                                               |       |         |  |  |  |  |      |         |
|            | CTRL: Mit-PS2- LOOP vs FAD-PS2: Mit-PS2- LOOP | MW | 0.0468 |            | CTRL: Mit-PS2- LOOP vs FAD-PS2: Mit-PS2- LOOP | MW | 0.0005  |                   |                                               |       |         |  |  |  |  |      |         |
|            |                                               |    |        |            | CTRL: Mit-CTRL vs FAD-PS2: Mit-PS2- LOOP      | MW | <0.0001 |                   |                                               |       |         |  |  |  |  |      |         |
|            |                                               |    |        |            | CTRL: Mit-PS2- LOOP vs FAD-PS2: Mit-CTRL      | MW | <0.0001 |                   |                                               |       |         |  |  |  |  |      |         |
| FIGURE S1  |                                               |    |        |            |                                               |    |         |                   |                                               |       |         |  |  |  |  |      |         |
| Figure S1A | CytAEQ                                        | MW | 0.763  | Figure S1B | CTRL vs PS2                                   | MW | 0.0306  | Figure S1C        | MitArea                                       | TT    | 0.797   |  |  |  |  |      |         |
|            | MitAEQ                                        | TT | 0.0096 |            | Mit perimeter                                 | TT | 0.9583  |                   |                                               |       |         |  |  |  |  |      |         |
|            |                                               |    |        |            | Circularity                                   | TT | 0.1968  |                   |                                               |       |         |  |  |  |  |      |         |
|            |                                               |    |        |            |                                               |    |         | Aspect Ratio (AR) | MW                                            | 0.517 |         |  |  |  |  |      |         |
